# Supplementary material for: Graphene quantum dot modified g-C3N4 for enhanced photocatalytic oxidation of ammonia performance
Source: Royal Society of Chemistry journal article supplement (doi:10.1039/c7ra07988e), 2017-01-01
Supplement: c7ra07988e1.pdf [file c7ra07988e1.pdf]

## Supplementary Information for “Graphene Quantum Dots Modified g-C<sub>3</sub>N<sub>4</sub> for Enhanced Photocatalytic Oxidation of Ammonia Performance”

Ruiling Wang<sup>a,b</sup>, Tian Xie<sup>a</sup>, Zhiyong Sun<sup>b</sup>, Taofei Pu<sup>a</sup>, Weibing Li<sup>b,c\*</sup>, Jin-Ping Ao<sup>a\*</sup>

<sup>a</sup> Institute of Technology and Science, Tokushima University, 2-1 Minami-Josanjima, Tokushima 770-8506, Japan. E-mail: Jin-Ping Ao; Email: jpao@ee.tokushima-u.ac.jp; Fax/Tel: +81 88 656 7442

<sup>b</sup> State Key Laboratory for Marine Corrosion and Protection, Luoyang Ship Material Research Institute (LSMRI), No. 149-1# Zhuzhou Road, Qingdao, 266101, China.

<sup>c</sup> School of Environment and Safety Engineering, Qingdao University of Science and Technology, 53 Zhengzhou Road, Qingdao 266042, China

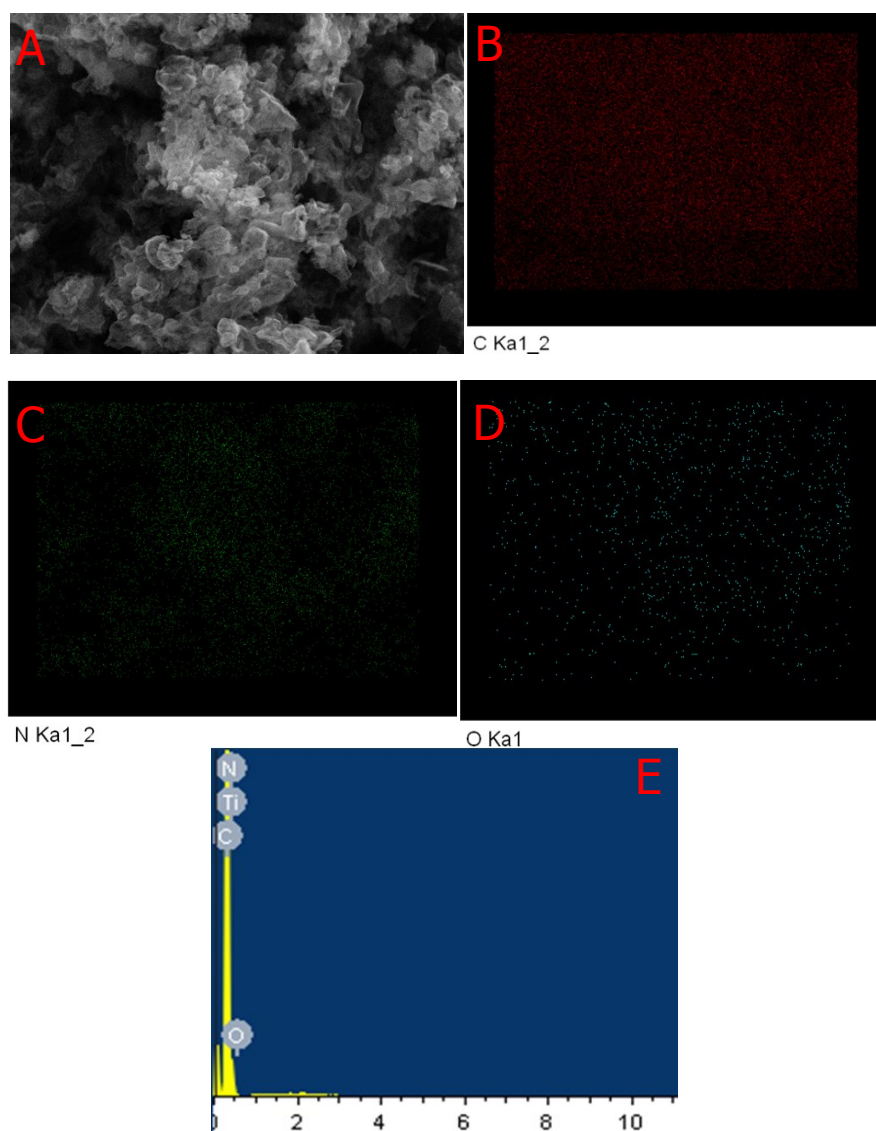

Figure S1. (A) SEM image of GQDs/CN 0.5; (B) C element; (C) N element; (D) O element; (E) EDS result.

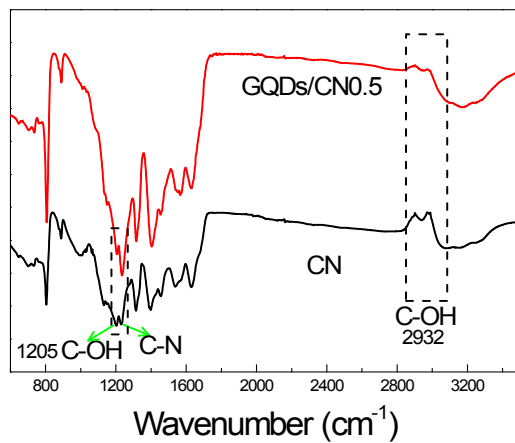

Figure S2. FT-IR result of CN and GQDs/CN 0.5.

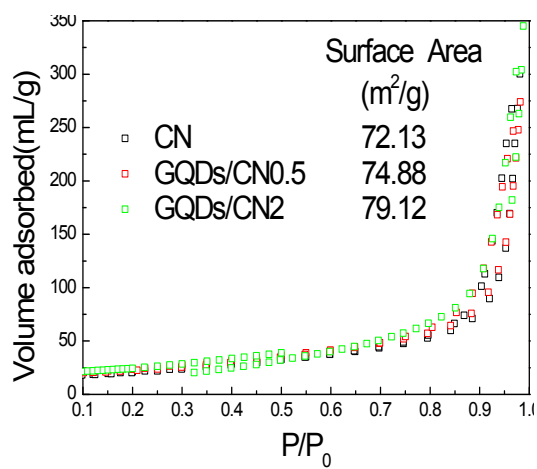

Figure S3. BET results of CN, GQDs/CN0.5 and GQDs/CN2.
